# Supplementary material
Source: PubMed Central journal article supplement (PMC3033953)
Supplement: 091786_1.pdf [file 091786_1.pdf]

**Appendix 1** (as supplied by the authors): Search strategy of MEDLINE database for randomized controlled trials of diabetes disease management

1. Case management
2. Managed care programs
3. Disease management
4. Patient care team
5. Home based intervention
6. Patient care management
7. 1 OR 2 OR 3 OR 4 OR 5 OR 6 (512 3621)
8. Glycated hemoglobin
9. HbA1c
10. 8 OR 9
11. Diabetes mellitus. Mp. [Mp = title, original title, abstract]
12. Randomized controlled trial
13. 7 AND 10 AND 11 AND 12 (2241)
14. Restriction on “adults” and “English publication”
15. 13 AND 14 (1891)
